# Supplementary material for: Poly(vinylamine-co-N-isopropylacrylamide) linear polymer and hydrogels with tuned thermoresponsivity
Source: Royal Society of Chemistry journal article supplement (doi:10.1039/d0sm00408a), 2020-01-01
Supplement: d0sm00408a1.pdf [file d0sm00408a1.pdf]

## Supporting Information

### **Poly(vinylamine-co-*N*-isopropylacrylamide) Linear Polymer and Hydrogels with Tuned Thermoresponsivity**

Thorsten Fischer<sup>a</sup>, Dan E. Demco<sup>a,b\*</sup>, Radu Fechete<sup>b</sup>, Martin Möller<sup>a\*</sup>, Smriti Singh<sup>a\*</sup>

<sup>a</sup>*DWI-Leibniz-Institute for Interactive Materials, e.V., RWTH-Aachen University, Forckenbeckstraße 50, D-52074 Aachen, Germany*

<sup>b</sup>*Technical University of Cluj-Napoca, Department of Physics and Chemistry, 25 G. Baritiu Str., RO-400027, Cluj-Napoca, Romania*

---

\*Corresponding authors: Fax: +49-241-233-01

E-Mail: [singh@dwirwth-aachen.de](mailto:singh@dwirwth-aachen.de)  
[demco@dwirwth-aachen.de](mailto:demco@dwirwth-aachen.de)  
[moeller@dwirwth-aachen.de](mailto:moeller@dwirwth-aachen.de)

## Table of Content

|                                                                                             |    |
|---------------------------------------------------------------------------------------------|----|
| 1. Determination of the average molecular weight between two crosslinking points $M_c$      | 3  |
| 2. Determination of the copolymerization parameters                                         | 3  |
| 3. Figure S1. Copolymerization parameters                                                   | 4  |
| 4. Figure S2. Proton spectra of p(NVF-co-NIPAm) before and after hydrolysis                 | 5  |
| 5. Table S1. Theoretical and experimental integral ratios                                   | 5  |
| 6. Figure S3 Proton NMR spectra of phenylcarbonate telechelic ethylene glycol               | 6  |
| 7. Figure S4. Hydrolysis kinetics                                                           | 6  |
| 8. Table S2. Degree of hydrolysis                                                           | 7  |
| 9. Figure S5. Frequency dependence of the copolymers on $G'$ and $G''$                      | 7  |
| 10. Figure S6. Proton spectrum of the hydrogels                                             | 8  |
| 11. Figure S7. Proton NMR spectra of the washed hydrogels                                   | 8  |
| 12. Figure S8. Proton NMR spectrum of the washing solution                                  | 9  |
| 13. Figure S9. Time dependence of $G'$ and $G''$ during the gelation                        | 9  |
| 14. Figure S10. UV-Vis spectrum of the swollen gel                                          | 10 |
| 15. Scheme S1. Gelation of p(VAm-co-NIPAm) with EG-PC                                       | 11 |
| 16. Figure S11. Rheology of the swollen gels                                                | 12 |
| 17. Figure S12. $G'$ and $G''$ dependence on the frequency of the swollen gels              | 12 |
| 18. Figure S13. Boltzmann fits of the temperature induced phase transition of the hydrogels | 13 |
| 19. Figure S14. SEM image of the hydrogel                                                   | 13 |

### Determination of the average molecular weight between two crosslinking points $M_c$

The ratio of the phenylcarbonate to amine moieties was kept 1:1, which means that the average molecular weight between two crosslinking points  $M_c$  equals the molecular weight of the average number of NIPAm units between two crosslinking points assuming a statistical distribution of the monomers within the copolymer and a crosslinking efficiency of 100%. The values are given in Table S1.

**Table S1.** Theoretical  $M_c$  values of the hydrogels

| VAm:NIPAm ratio | $M_c$ [g·mol <sup>-1</sup> ] |
|-----------------|------------------------------|
| 1:5             | 565                          |
| 1:4             | 452                          |
| 1:3             | 339                          |

### Determination of the copolymerization parameters

The copolymerization parameters were determined by the methods of Fineman-Ross and Mayo- Lewis. The Fineman-Ross method uses a linearization of the copolymerization equation (S1)<sup>S1</sup>.

$$\frac{d[A]}{d[B]} = \frac{1 + r_A \frac{[A]}{[B]}}{1 + r_A \frac{[B]}{[A]}} = \frac{[A]}{[B]} * \frac{r_A[A] + [B]}{[A] + r_B[B]} \quad (S1)$$

With [A] and [B] being the concentration of the monomers and  $r_A$  and  $r_B$  the respective copolymerization parameters. The linearization suggested by Fineman and Ross leads to Equation (2)

$$y * \frac{x-1}{x} = \frac{y^2 r_A}{x} - r_B \quad (S2)$$

With  $x = n_A n_B^{-1}$  and  $y = [A] [B]^{-1}$

Where  $n_A$  and  $n_B$  is the amount of monomer A and B, respectively. The copolymerization parameters can be determined with the slope ( $r_A$ ) and the y-intercept ( $r_B$ ) plotting  $y \cdot (x-1) x^{-1}$  against  $y^2 x^{-1}$ .

Determination of the copolymerization parameters by Mayo-Lewis

Another linearization was suggested by Mayo and Lewis (Equation S3)<sup>S2</sup>

$$r_A = \frac{[B]}{[A]} \left[ \frac{n_A}{n_B} \left( 1 + \frac{[B]}{[A]} r_B \right) - 1 \right] \quad (S3)$$

Every monomer ratio will result in a straight line. The intersections of these lines will give the copolymerization parameters.

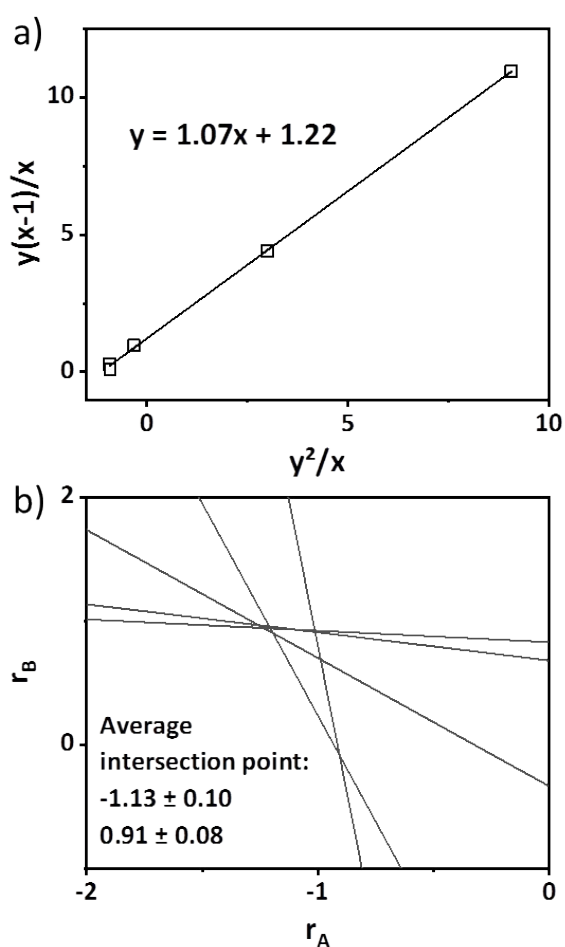

**Figure S1.** Copolymerization parameters determined with the methods of a) Fineman-Ross and b) Mayo-Lewis

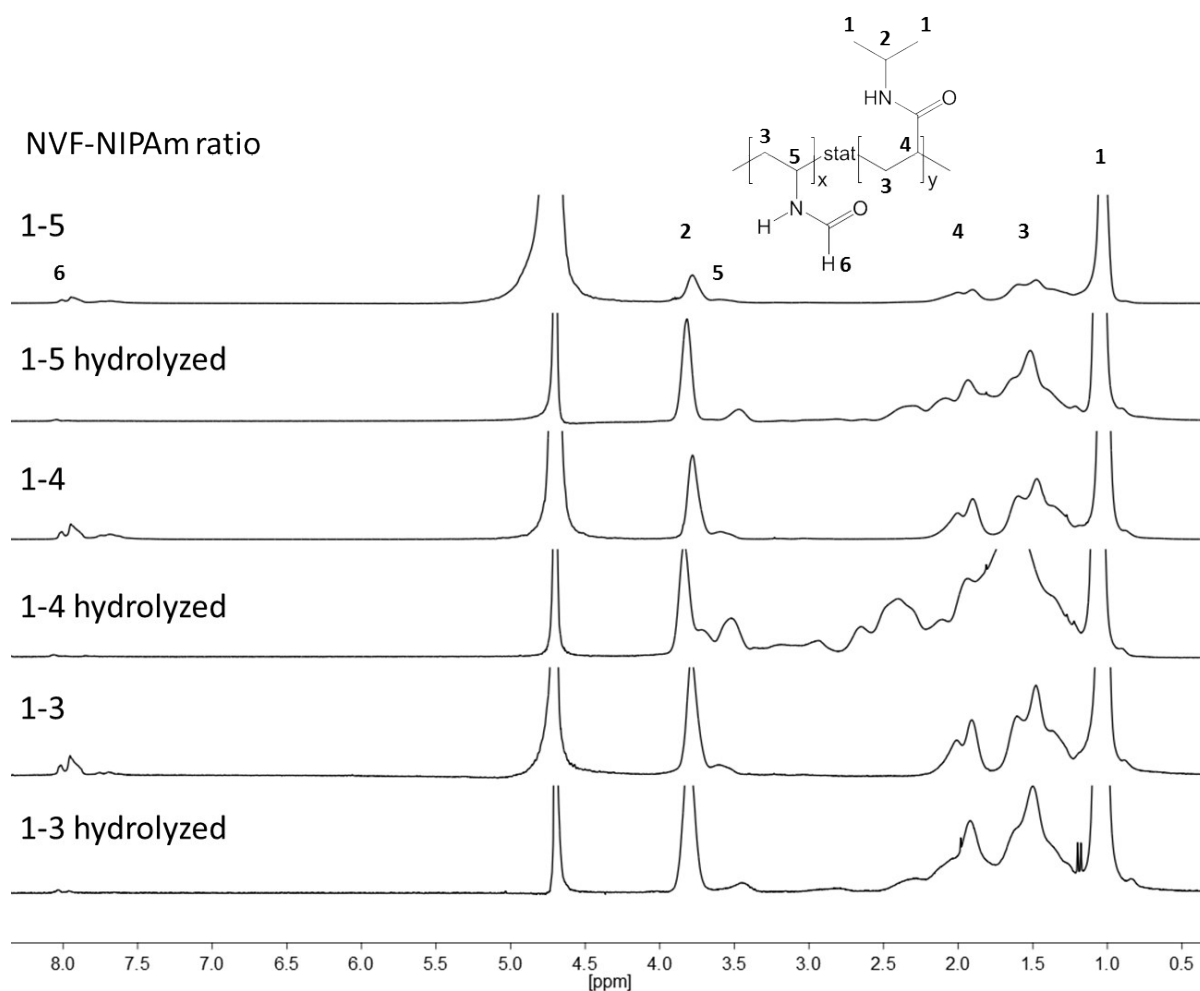

**Figure S2.** Proton NMR spectra of p(NVF-co-NIPAm) before and after hydrolysis. It is visible that the signal of the formamide proton nearly disappears after hydrolysis.

**Table S2.** Theoretical and experimental integral ratios 1:5, 1:4, and 1:3. The integral of the iso-propylgroup was taken as reference.

| VAm:NIPAm ratio | Integral iso-propyl group I1/6 | Integral formamide group I6 |
|-----------------|--------------------------------|-----------------------------|
| 1:5             | 5                              | 0.99                        |
| 1:4             | 4                              | 1.29                        |
| 1:3             | 3                              | 1.01                        |

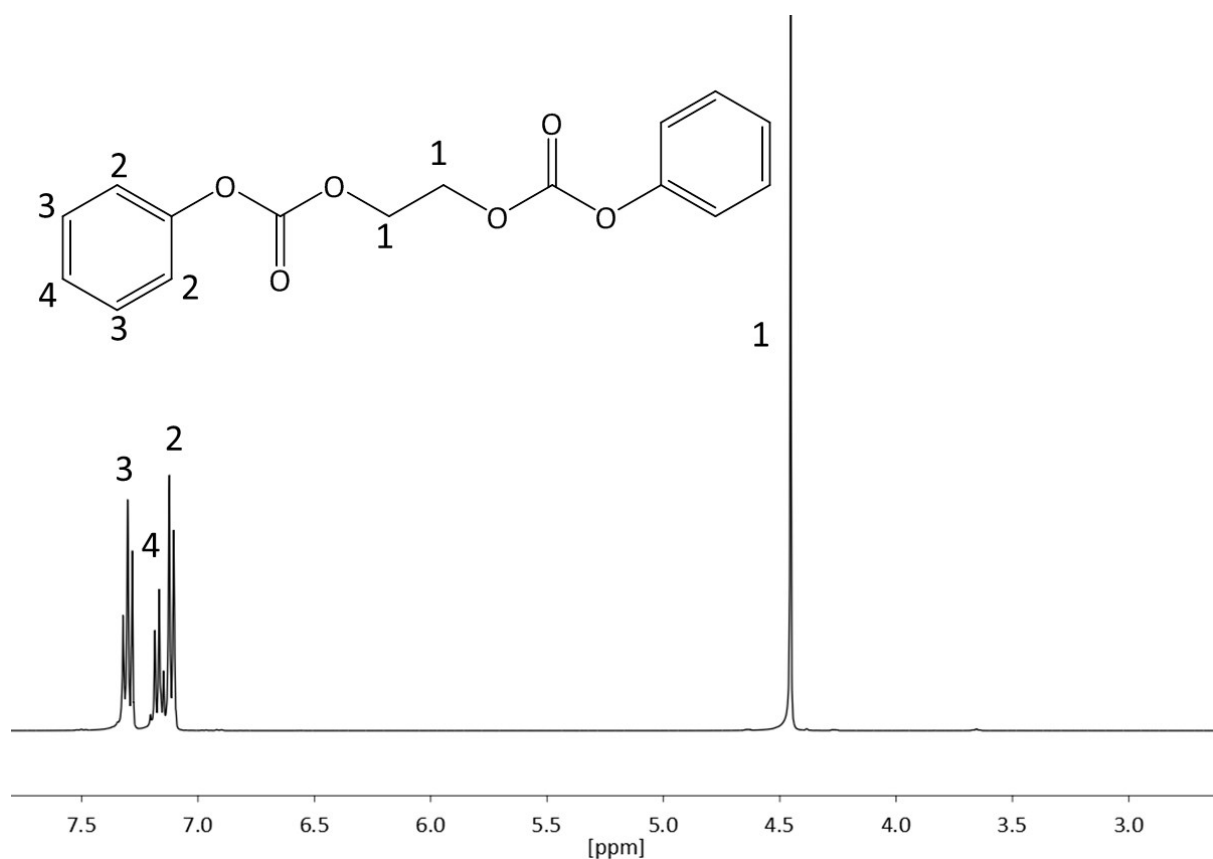

**Figure S3.** Proton NMR spectra of phenylcarbonate telechelic ethylene glycol in CDCl<sub>3</sub>.

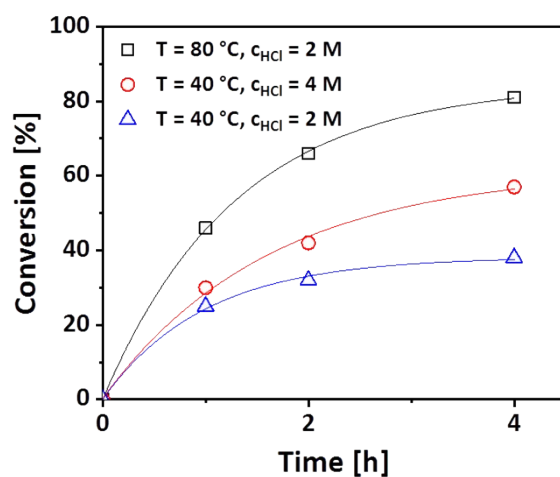

**Figure S4.** Degree of hydrolysis after 1, 2 and 4 h. The continuous line represents an exponential fit.

**Table S3.** Degree of hydrolysis for the VAm:NIPAm ratios 1:5, 1:4, and 1:3.

| VAm:NIPAm ratio | Degree of hydrolysis [%] |
|-----------------|--------------------------|
| 1:5             | 91.5                     |
| 1:4             | 90.2                     |
| 1:3             | 93.3                     |

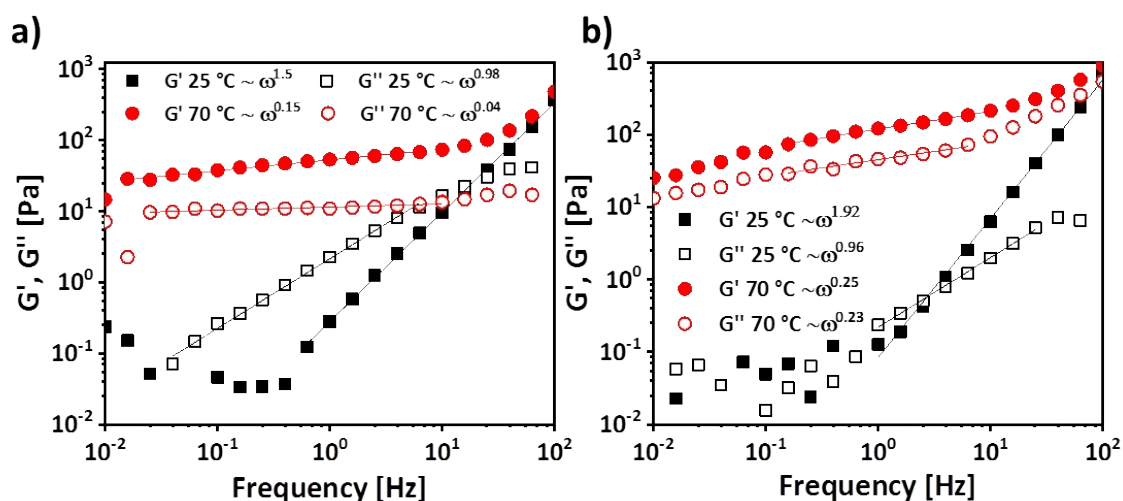

**Figure S5.** Frequency dependence of storage modulus ( $G'$ ) and loss modulus ( $G''$ ) for P(VAm-co-NIPAm) linear polymers with VAm:NIPAm monomer ratios of 1:3 (a) and 1:4 (b). The rheometry measurements were made at temperature of 25 °C (squares) and 70 °C (circles). The frequency dependence power law exponents are shown in the figure legend and obtained from the fit with a straight lines.

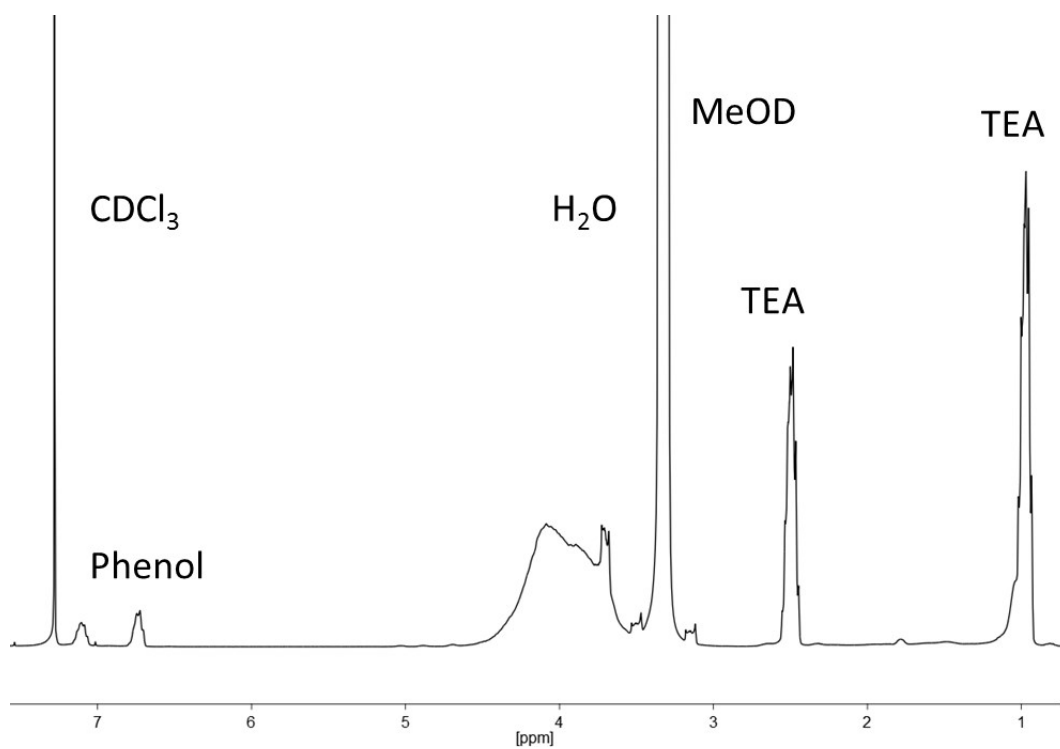

**Figure S6.** Proton NMR spectrum of the gel prepared inside the NMR tube in CDCl<sub>3</sub> and MeOD in presence of triethyl amine (TEA). The presence of phenol shows the successful conversion of the crosslinker.

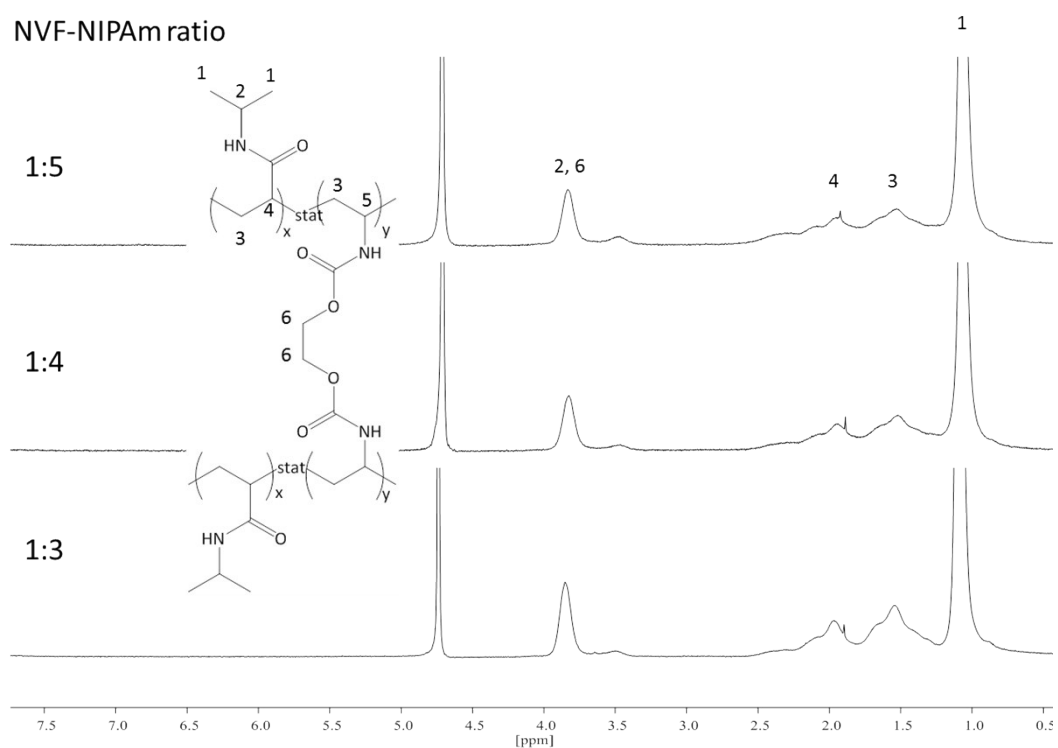

**Figure S7.** Proton NMR spectra of the washed hydrogels in D<sub>2</sub>O. It is visible that there is no phenol present



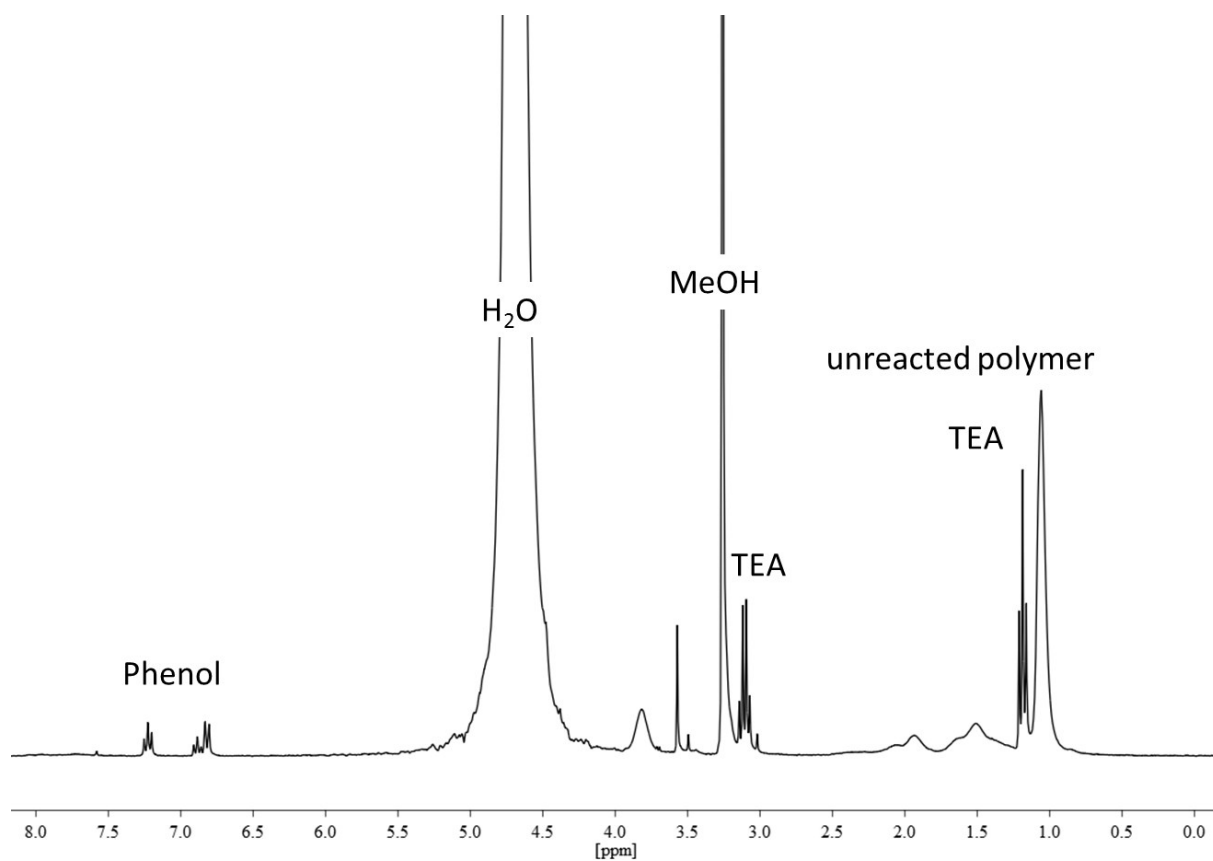

**Figure S8.** Proton NMR spectrum of the washing solution, where the phenol and (TEA) is present

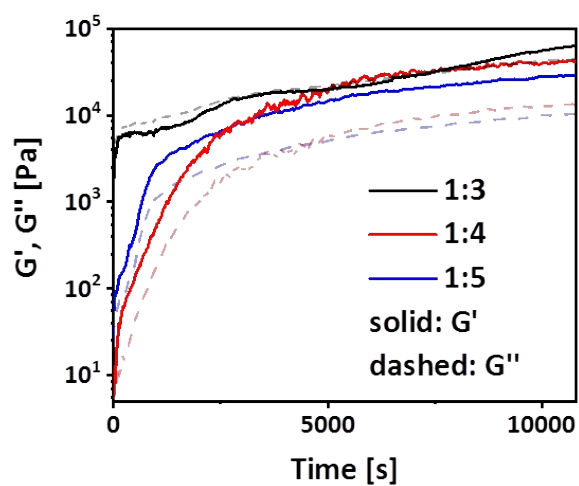

**Figure S9.** The storage modulus  $G'$  and loss modulus  $G''$  in dependence of the time for the gelation of different VAm:NIPAm ratios inside the rheometer.

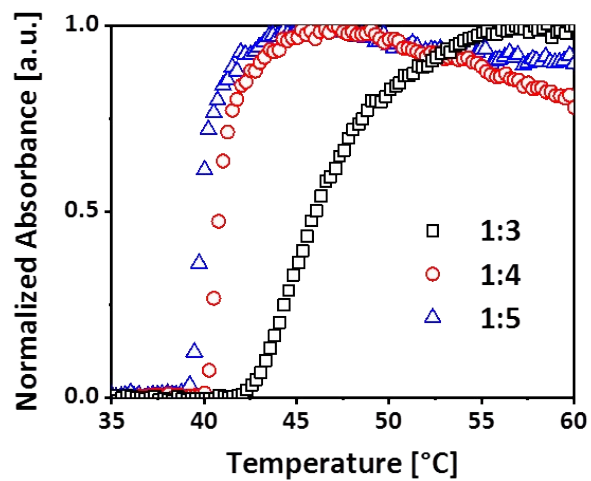

**Figure S10.** UV-Vis spectra of the swollen gels with different VAm:NIPAm ratio in dependence of the temperature (260 nm, pH = 7, 0.5 °C·min<sup>-1</sup>).

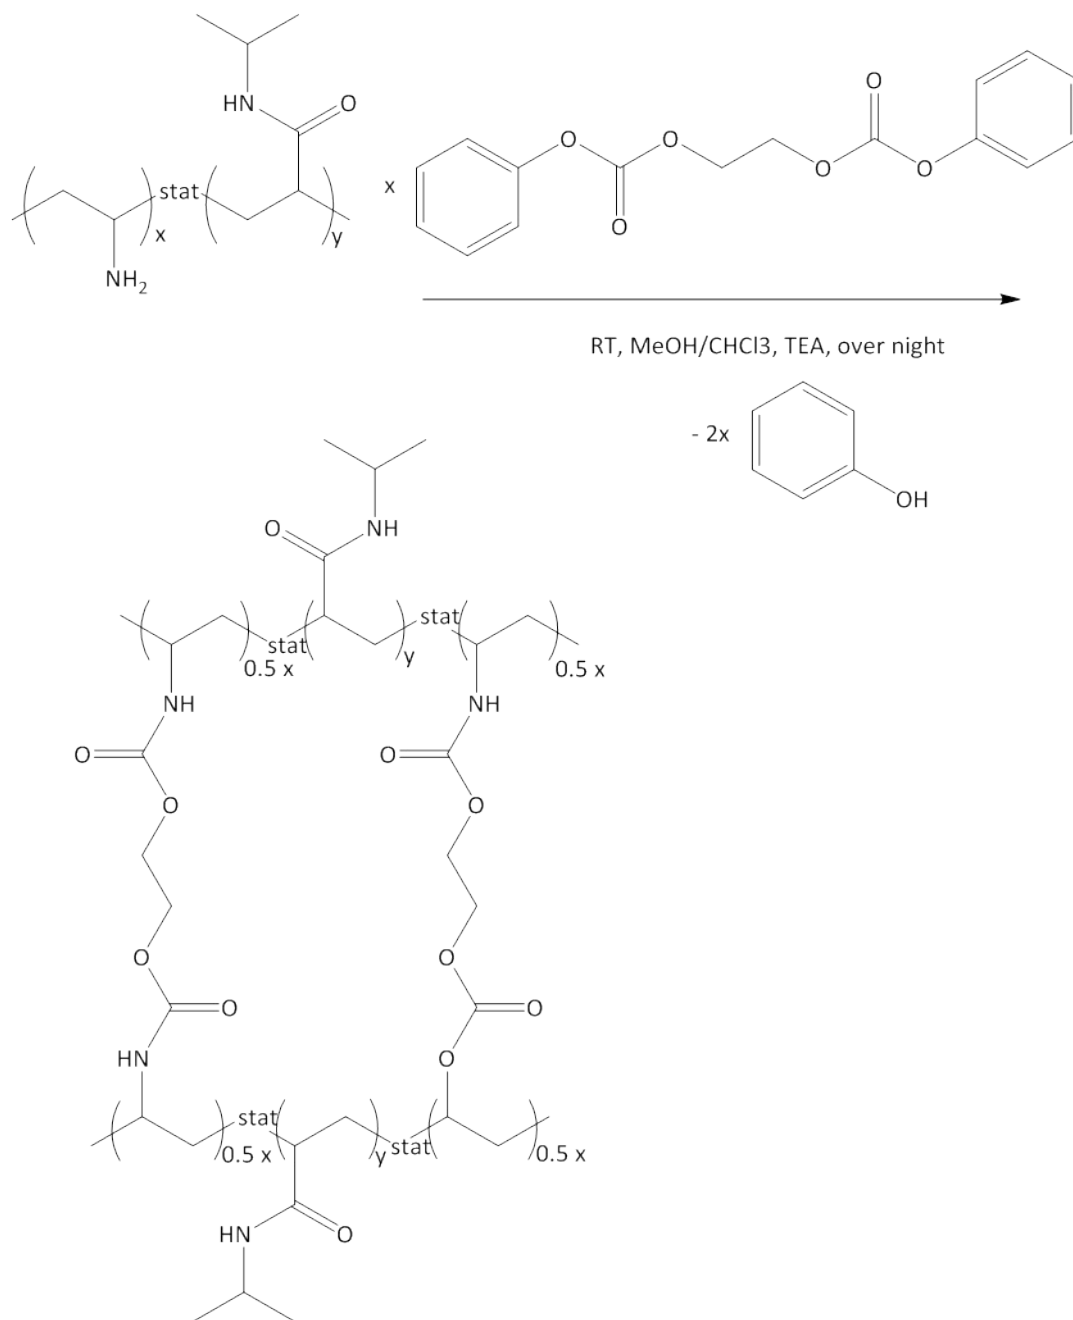

**Scheme S1.** Gelation of P(VAm-co-NIPAm) with phenylcarbonate telechelic ethylene glycol.

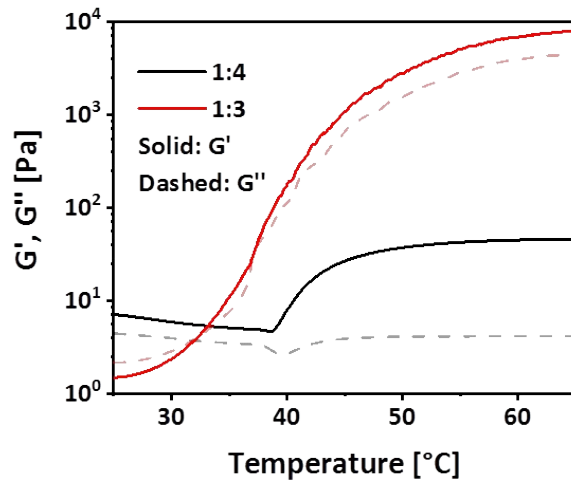

**Figure S11.** Temperature ramp of the swollen gels for the VAm:NIPAm ratio of 1:4 and 1:3.

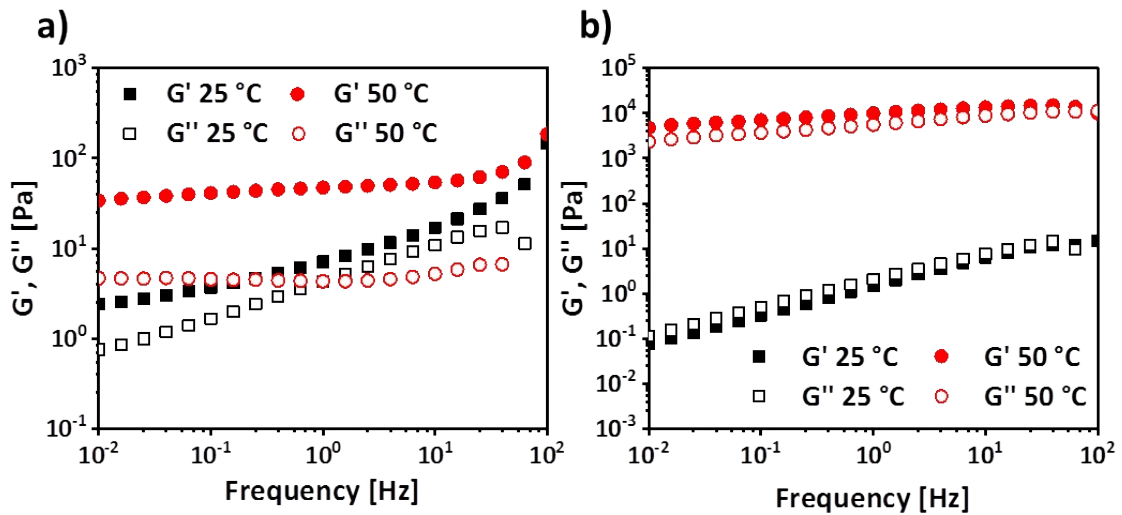

**Figure S12.** Frequency dependence of the swollen gels with the VAm:NIPAm ratios of 1:4 (a) and 1:3 (b).

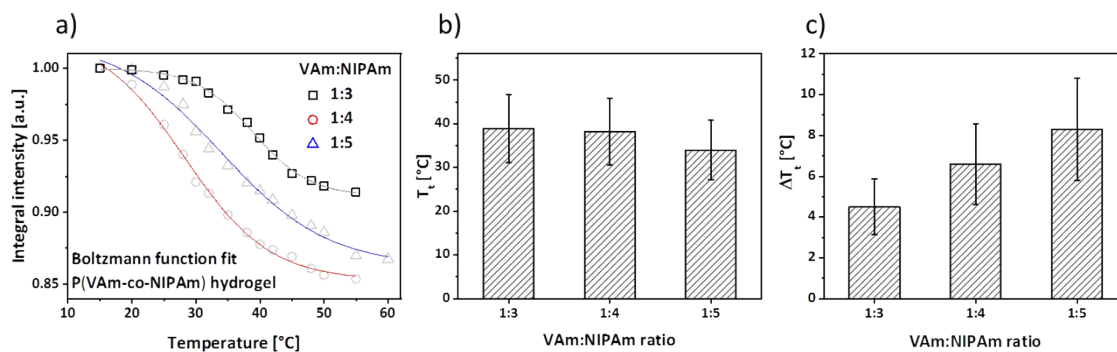

**Figure S13** (a) Temperature-induced phase transition curves of poly(VAm-*stat*-NIPAm) hydrogels with different VAm:NIPAm monomer ratios. The data were fitted with Boltzmann functions and shown with continuous lines. (b) Transition temperatures  $T_t$ , and (c) width of transition temperatures  $\Delta T_t$  as a function of monomer ratios obtained from the fits with Boltzmann functions.

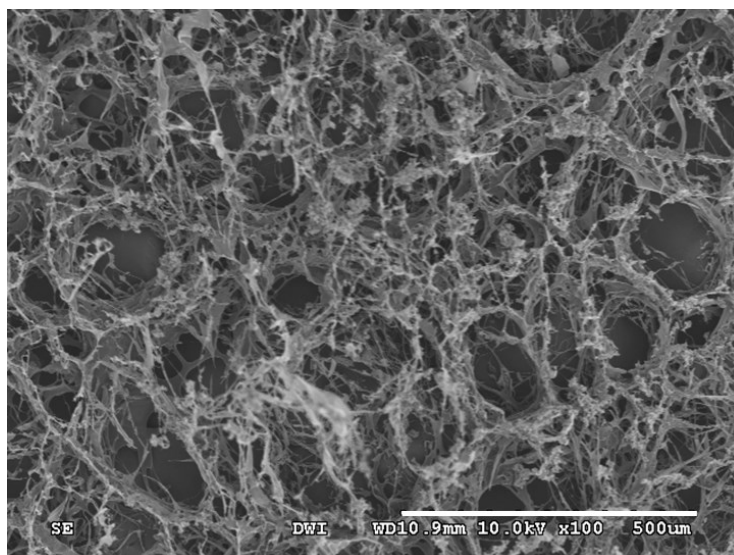

**Figure S14.** SEM image of the hydrogel with the VAm:NIPAm ratio 1:5. The scale bar represents 500 μm.

## References

- S1 M. Fineman and S. D. Ross, *J. Polym. Sci.*, 1950, **5**, 259-265.  
 S2 F. R. Mayo and F. M. Lewis, *J. Am. Chem. Soc.*, 1944, **66**, 1594-1601.
